# Supplementary material for: β-Lactoglobulin-Modified Mesoporous Silica Nanoparticles: A Promising Carrier for the Targeted Delivery of Fenbendazole into Prostate Cancer Cells
Source: MDPI journal article supplement (doi:10.3390/pharmaceutics14040884), 2022-04-18
Supplement: s1 [file s1]

# Supplementary Materials: $\beta$ -Lactoglobulin-Modified Mesoporous Silica Nanoparticles: A Promising Carrier for the Targeted Delivery of Fenbendazole into Prostate Cancer Cells

Maedeh Koochi Moftakhari Esfahani, Seyed Ebrahim Alavi, Peter J. Cabot, Nazrul Islam and Emad L. Izake

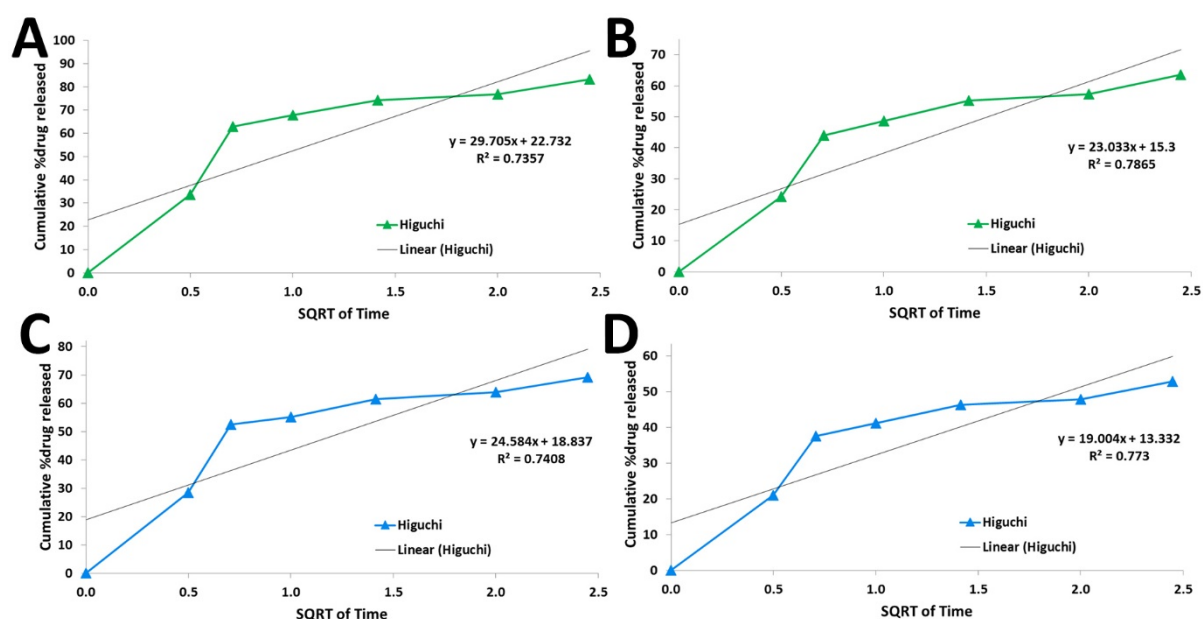

**Figure S1.** The Higuchi model of FBZ release from (A) FBZ-MCM (pH1.2), (B) FBZ-MCM (pH6.8), (C) FBZ-MCM-BLG (pH1.2), and (D) FBZ-MCM-BLG (pH6.8). Results are expressed as mean  $\pm$  SD of three independent experiments.

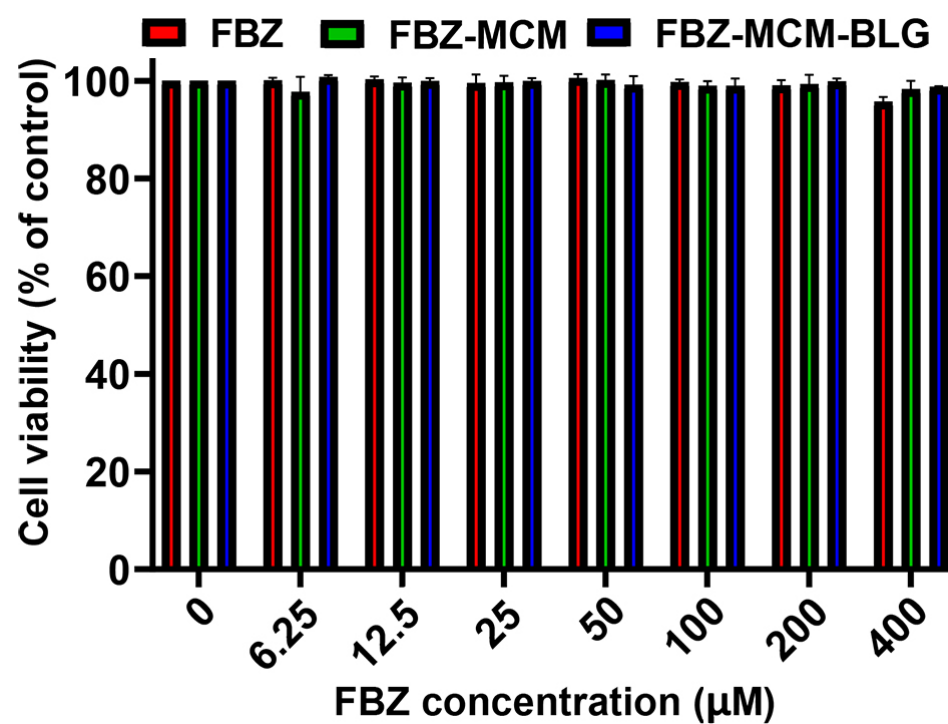

**Figure S2.** Viability effects of FBZ-MCM and FBZ-MCM-BLG nanoparticles, compared to FBZ, on the human embryonic kidney 293 (HEK-293) cells after 48 h incubation. The data are expressed as mean  $\pm$  SD ( $n = 3$ ).
